# Supplementary material
Source: PubMed Central journal article supplement (PMC3662506)
Supplement: supp_mcs226_mcs226supp.pdf [file supp_mcs226_mcs226supp.pdf]

## SUPPLEMENTARY DATA

APPENDIX S1. Taxa used in this study and voucher information.

Abbreviations (except herbarium codes): ASDM = Arizona-Sonora Desert Museum, Tucson, Arizona, USA; cult. = cultivated; DBG = Desert Botanical Garden, Phoenix, Arizona, USA; DELEP = Desert Legume Program of the University of Arizona, Tucson, Arizona, USA; s.n. = *sine numerus* (Latin, no collection number); UA = University of Arizona, Tucson, Arizona, USA; UMBG = Botanical Garden of the University of Munich, Munich, Germany. For herbarium codes see Index Herbariorum (Thiers, continuously updated). For details about clades see Marazzi *et al.* (2006). For GenBank accessions and voucher information about the taxa in the molecular phylogenetic tree see Marazzi and Sanderson (2010), their Appendix S1 in the supplementary material.

| Taxon name and authority                                                   | Clade | Voucher specimen, locality                                                            | Deposited at                                    |
|----------------------------------------------------------------------------|-------|---------------------------------------------------------------------------------------|-------------------------------------------------|
| <i>Senna alata</i> (L.) Roxb.                                              | II    | Marazzi & al. BM242, Bolivia, Tarija                                                  | CTES, Z                                         |
| <i>S. aphylla</i> (Cav.) H.S. Irwin & Barneby                              | VIa   | XDL 91-0486D, cult. at DELEP                                                          | ARIZ, DELEP                                     |
| <i>S. artemisioides</i> (DC.) Randell                                      | IVa   | XDL 96-0039, cult. at DELEP                                                           | ARIZ, DELEP                                     |
| <i>S. aversiflora</i> (Herbert) H.S. Irwin & Barneby                       | VI    | Queiroz & Marazzi LQ9204, Brazil, Bahia                                               | HUEFS, Z                                        |
| <i>S. bracteosa</i> * D. Cardoso & L.P. Queiroz (Fig. 2I)                  | V     | Cardoso & Bastos2052, Brazil, Bahia                                                   | HUEFS                                           |
| <i>S. bracteosa</i> * D. Cardoso & L.P. Queiroz(Fig. 2J)                   | V     | Cardoso & Santana 1306, Brazil, Bahia [type location, see Cardoso and Queiroz (2008)] | BRIT, CEPEC, HUEFS, K, MBM, MO, NY, RB, SP, SPF |
| <i>S. cana</i> var. <i>calva</i> H.S. Irwin & Barneby                      | V     | Conceição & Marazzi AC1132, Brazil, Bahia                                             | HUEFS, Z                                        |
| <i>S. costata</i> (J.F. Bailey & C. White) Randell                         | IVa   | XDL 91-0400D, cult. at DELEP                                                          | ARIZ, DELEP                                     |
| <i>S. covesii</i> A. Gray                                                  | VII   | Marazzi BM353, cult. at UA                                                            | ARIZ                                            |
| <i>S. didymobotrya</i> (Fresen.) H.S. Irwin & Barneby                      | II    | Marazzi & Arrigo BM331, cult.parking lot, USA, Arizona                                | ARIZ                                            |
| <i>S. hirsuta</i> var. <i>glaberrima</i> (M.E. Jones) H.S. Irwin & Barneby | VII   | Marazzi BM327, USA,Arizona                                                            | ARIZ, DELEP                                     |
| <i>S. italica</i> * Mill.                                                  | II    | Weavings.n., Africa                                                                   | -                                               |
| <i>S. martiana</i> (Benth.) H.S. Irwin & Barneby                           | II    | Queiroz s.n., cult. at HUEFS                                                          | HUEFS, ARIZ                                     |
| <i>S. occidentalis</i> (L.) Link                                           | VIIa  | Marazzi & Solís Neffa BM231, Argentina, Corrientes                                    | CTES, Z                                         |
| <i>S. pallida</i> (Vahl) H.S. Irwin & Barneby                              | VI    | XDL 90-0351, cult. at DELEP                                                           | ARIZ, DELEP                                     |
| <i>S. paradictyon</i> (Vogel) H.S. Irwin & Barneby                         | II    | Marazzi et al. BM028, Paraguay, Alto Paraná                                           | CTES, PY, Z                                     |
| <i>S. pendula</i> (Willd.) H.S. Irwin & Barneby                            | VIIa  | Marazzi et al. BM222, Argentina, Corrientes                                           | CTES, Z                                         |

| <i>S. pilifera</i> (Vogel) H.S. Irwin & Barneby           | IVb   | Marazzi <i>et al.</i> BM256, Bolivia, Santa Cruz | CTES, Z.     |
|-----------------------------------------------------------|-------|--------------------------------------------------|--------------|
| Taxon name and authority (cont.)                          | Clade | Voucher specimen, locality                       | Deposited at |
| <i>S. pleurocarpavar. pleurocarpa</i> (F. Muell.) Randell | II    | XDL 96-0088, cult. at DELEP                      | ARIZ, DELEP  |
| <i>S. purpusii</i> (Brandege) H.S. Irwin & Barneby        | VIIa  | Marazzi BM302, cult. at DBG                      | ARIZ, DBG    |
| <i>S. robinifolia</i> (Benth.) H.S. Irwin & Barneby       | VI    | Marazzi BM005, cult. at UMBG with nr. 98/3500w   | Z            |
| <i>S. tonduzii</i> (Standl.) H.S. Irwin & Barneby         | VI    | Marazzi & Flores BM187, Mexico, Chiapas          | MEXU, Z      |

\* Specimen with no collected material available in this study, used for illustration purpose only.

## LITERATURE CITED

- Cardoso DBOS, Queiroz LPQ. 2008. A New Species of *Senna* (Leguminosae, Caesalpinioideae) from Eastern Brazil. *Novon* **18**: 140–143.
- Marazzi B, Endress PK, Paganucci de Queiroz L, Conti E. 2006a. Phylogenetic relationships within *Senna* (Leguminosae, Cassiinae) based on three chloroplast regions: patterns in the evolution of floral symmetry and extrafloral nectaries. *American Journal of Botany* **93**: 288–303.
- Marazzi B, Sanderson MJ. 2010. Large-scale patterns of diversification in the widespread legume genus *Senna* and the evolutionary role of extrafloral nectaries. *Evolution* **64**: 3570–3592.
- Thiers B. [continuously updated]. Index Herbariorum: A global directory of public herbaria and associated staff. New York Botanical Garden's Virtual Herbarium. <http://sweetgum.nybg.org/ih/>

APPENDIX S2. Character matrix of EFN diversity in *Senna*.

Characters coded for 88 taxa (*Senna* spp. and outgroups). Proportion of missing data calculated by Mesquite: 0.06439394. Taxon names as in the trees in Appendix S3 consist of abbreviated genus and species (and variety) names, plus collection number in *Senna* species (see Appendix S1 above, and also Marazzi and Sanderson, 2010). Following multistate characters were coded (question marks indicate missing information):

- (A) EFN location on plant: 0 = EFNs absent, 1 = leaves, 2 = stipules, 3 = bracts, 4 = sepals, 5 = bract scar, 6 = base of pedicels.
- (B) Location of EFNs on leaves: 0 = no EFNs on leaves, 1 = EFNs at the base of the petiole (near or on the pulvinus), 2 = along the petiole (well above the base and below the first pair of leaflets), 3 = between the first (i.e., the most proximal) pair of leaflets only, 4 = between the first pair of leaflets and also the subsequent, 5 = between all pairs of leaflets.
- (C) EFN morphology: 0 = EFNs absent, 1 = individualized EFNs, 2 = non-individualized EFNs, 3 = trichomes.

| <b>Taxon</b> | <b>A</b> | <b>B</b> | <b>C</b> |
|--------------|----------|----------|----------|
| Cae decape   | 0        | 0        | 0        |
| Cas fistul   | 0        | 0        | 0        |
| Ch desvaux   | 1        | 2        | 1        |
| Delo regia   | 0        | 0        | 0        |
| Gle triaca   | 0        | 0        | 0        |
| S galBM165   | 0        | 0        | 0        |
| S polBM172   | 0        | 0        | 0        |
| S siaBM157   | 0        | 0        | 0        |
| S silBM068   | 0        | 0        | 0        |
| S didBM002   | 2        | 0        | 2        |
| S itaZIETS   | 2&3&4    | 0        | ?        |
| S ma861394   | ?        | 0        | ?        |
| S marP7916   | 2&3&4    | 0        | 2        |
| S nicBM185   | ?        | 0        | ?        |
| S no872886   | ?        | 0        | ?        |
| S parBM028   | 3&4      | 0        | 2        |
| S pl930575   | 2&3&4    | 0        | 2        |
| S retBM154   | ?        | 0        | ?        |
| S andBM162   | 0        | 0        | 0        |
| S atoBM173   | 0        | 0        | 0        |
| S speBM029   | 0        | 0        | 0        |
| S uniBM167   | 0        | 0        | 0        |
| S wisBM169   | 0        | 0        | 0        |
| S skiBM176   | 1        | 3        | 1        |
| S accJ1137   | 1        | 3        | 1        |
| S acipD432   | 1        | 4        | 1        |
| S co842721   | 1        | 3        | 1        |
| S gl952287   | 1        | 3        | 1        |
| S nn952265   | 1        | 4        | 1        |
| S nnnBM296   | 1        | 4        | 1        |
| S chlBM128   | 1        | 3        | 1        |
| S darBM153   | 1        | 3        | 1        |
| S garP7866   | 1        | 3        | 1        |
| S hayBM150   | 1        | 3        | 1        |
| S herM5084   | 1        | 3        | 1        |
| S macBM082   | 1        | 3        | 1        |
| S mucBM019   | 1        | 3        | 1        |
| S nnnBM160   | 1        | 3        | 1        |
| S obtBM024   | 1        | 4        | 1        |
| S pilBM011   | 1        | 5        | 1        |
| S pinP9210   | 1        | 5        | 1        |
| S quiP9220   | 1        | 5        | 1        |
| S rizC1126   | 1        | 3        | 1        |
| S rugG2337   | 1        | 5        | 1        |

| <b>Taxon (cont.)</b> | <b>A</b> | <b>B</b> | <b>C</b> |
|----------------------|----------|----------|----------|
| S splA1566           | 1        | 3        | 1        |
| S c cC1132           | 1&6      | 4        | 1        |
| S nnnM4988           | 1&6      | 4        | 1        |
| S phiMS209           | 1&6      | 5        | 1        |
| S uniBM186           | 1&6      | 4        | 1        |
| S velF2453           | 1&6      | 4        | 1        |
| S a aP9198           | 1        | 4        | 1        |
| S a cP9177           | 1        | 4        | 1        |
| S aphBM084           | ?        | 0        | ?        |
| S chaBM083           | ?        | 0        | ?        |
| S craBM120           | ?        | 0        | ?        |
| S holBM161           | 1        | 3        | 1        |
| S kurBM233           | 1        | 3        | 1        |
| S mul liLP           | 1        | 3        | 1        |
| S mul muBM           | 1        | 3        | 1        |
| S palBM178           | 1&6      | 4        | 1        |
| S rigBM108           | ?        | 0        | ?        |
| S robBM005           | 1&6      | 4        | 1        |
| S tonBM187           | 1&6      | 5        | 1        |
| S wilBM158           | 1        | 5        | 1        |
| S arnBM234           | 1        | 3        | 1        |
| S barBM136           | 1        | 1        | 1        |
| S bicBM159           | 1        | 3        | 1        |
| S birBM090           | 1        | 3        | 1        |
| S cerBM007           | 1        | 1        | 1        |
| S corBM103           | 1        | 3        | 1        |
| S hilBM027           | 1        | 3        | 1        |
| S hir h115           | 1        | 1        | 1        |
| S hir leBM           | 1        | 1        | 1        |
| S mexBM006           | 1        | 3        | 1        |
| S nnnCG491           | 1        | 4        | 1        |
| S occBM060           | 1        | 1        | 1        |
| S penBM117           | 1        | 4        | 1        |
| S purBM004           | 1        | 3        | 1        |
| S scaBM229           | 1        | 1        | 1        |
| S sepBM140           | 1        | 4        | 1        |
| S subPB427           | 1        | 3        | 1        |
| S apiBM170           | 1        | 3        | 1        |
| S argBM175           | 1        | 3        | 1        |
| S armJS751           | 1        | 3        | 1        |
| S baS12700           | 1        | 3        | 1        |
| S covBM297           | 1        | 5        | 1        |
| S croBM163           | 1        | 4        | 1        |
| S vilBM174           | 1        | 4        | 1        |

APPENDIX S3. Outputs of ancestral character states analyses in Mesquite.

Tracing history of characters A–C over the ML *Senna* tree and over 500 ML bootstrap trees (trees from Marazzi and Sanderson, 2010; only one of 500 ML bootstrap trees shown), and calculating tree values (tree length, CI, RI). See Appendices S1 and S2 (above) for complete specimen names and details on character states and coding, respectively.

\*\* Maximum likelihood tree (Marazzi and Sanderson, 2010).  
Tree with node numbers:

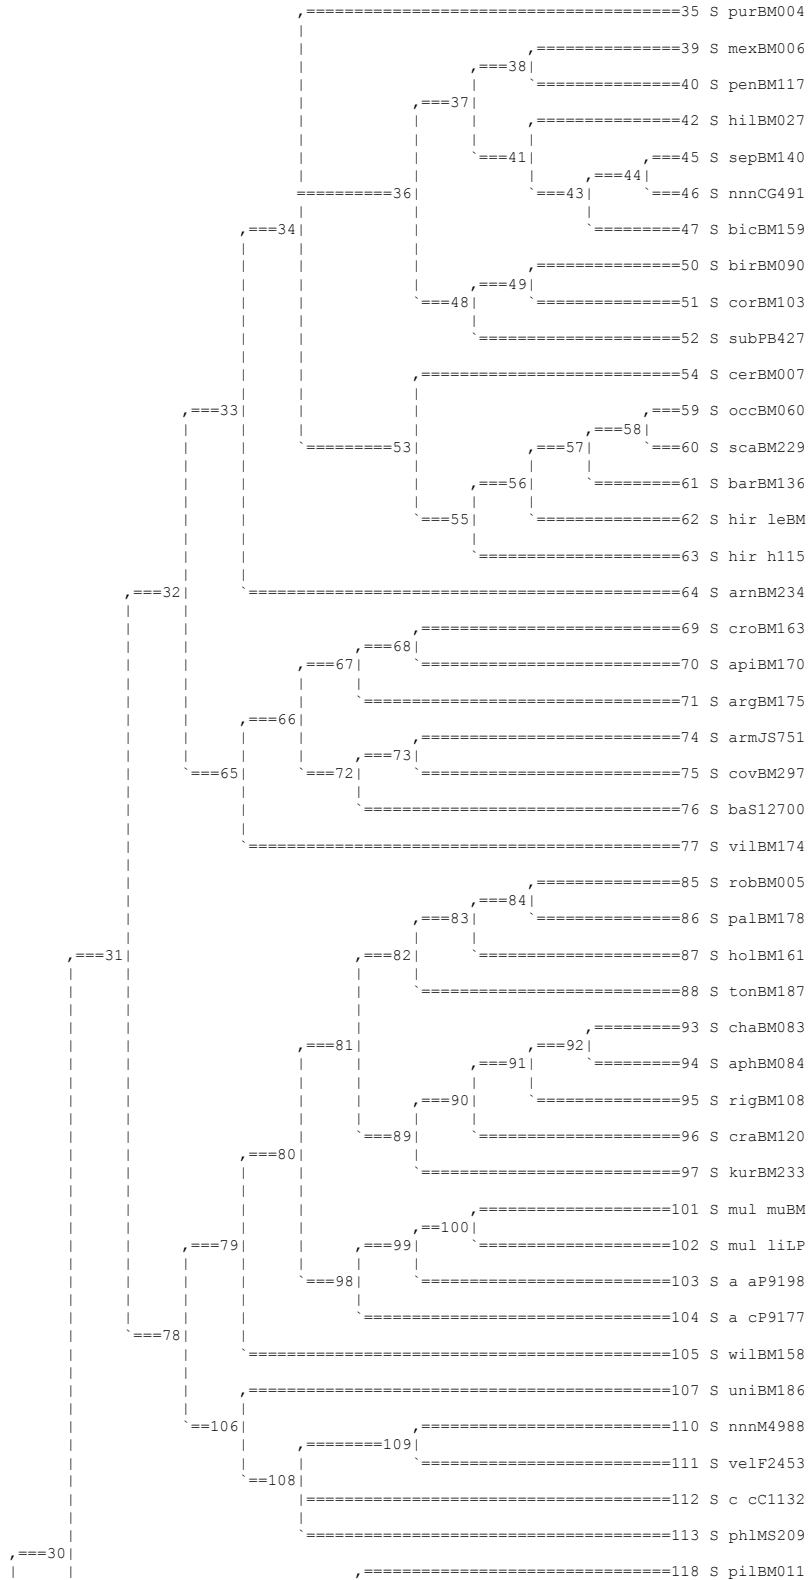

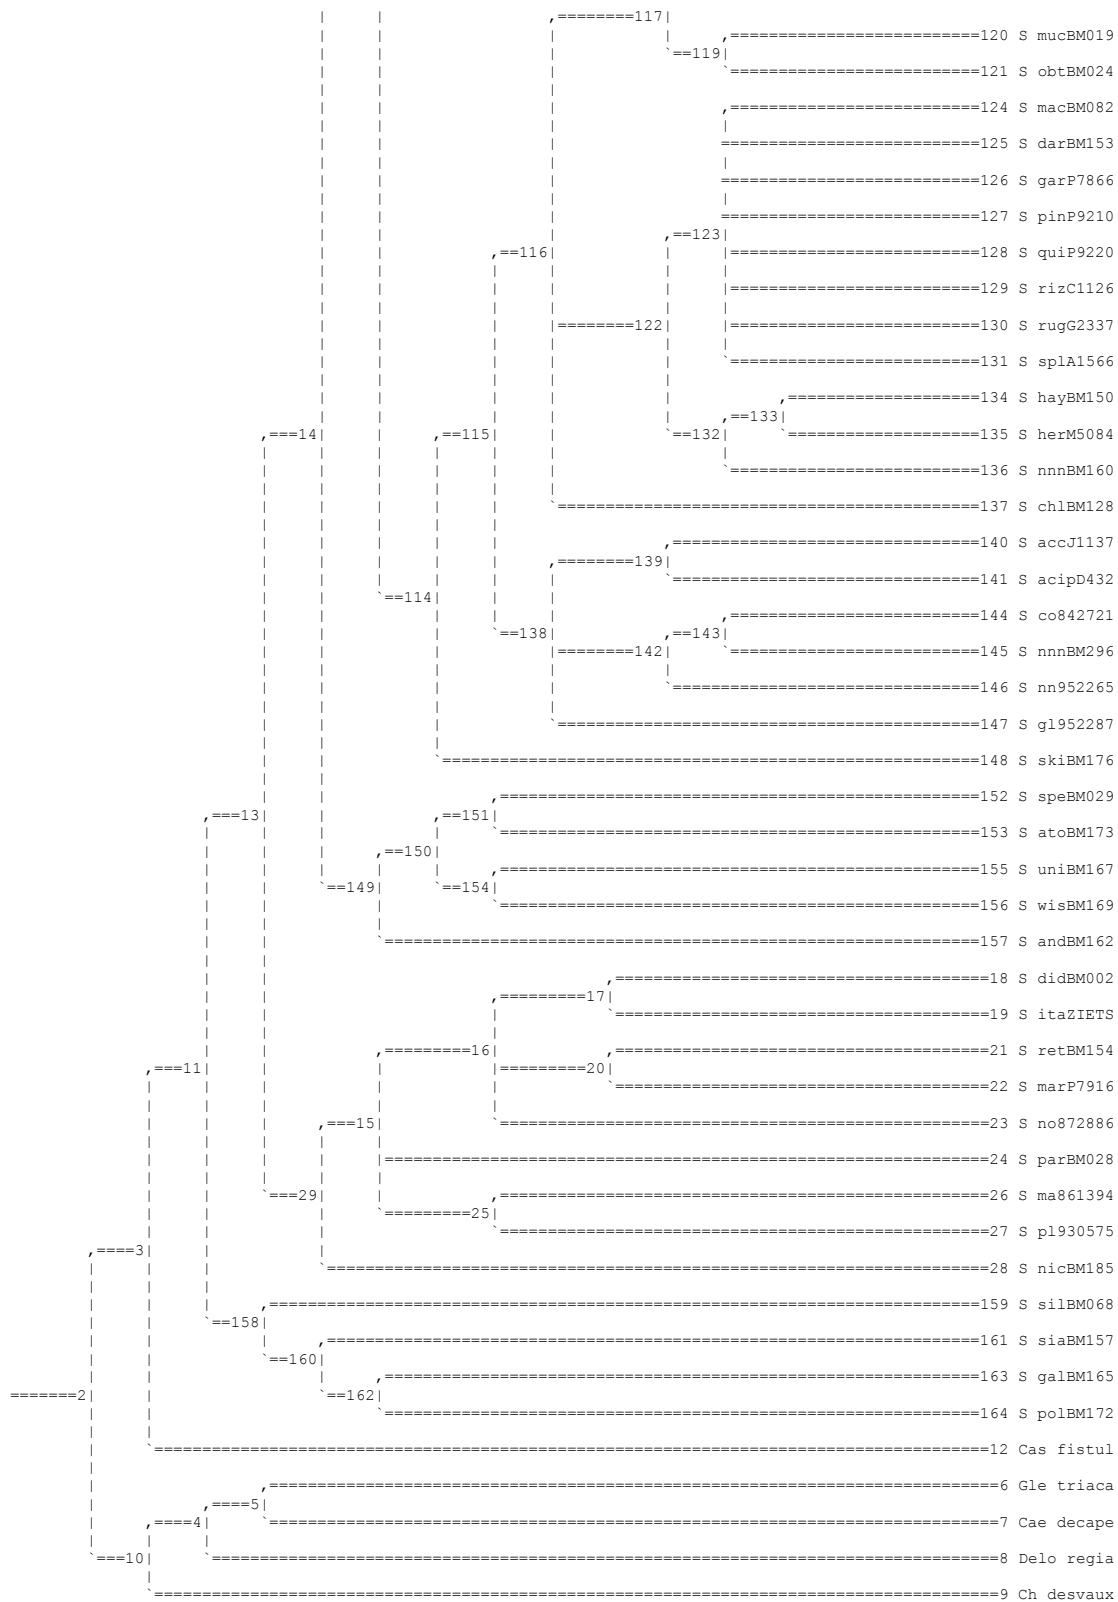

\*\* Tree 1 out of 500 likelihood bootstrap trees from Marazzi and Sanderson (2010).

Tree with node numbers:

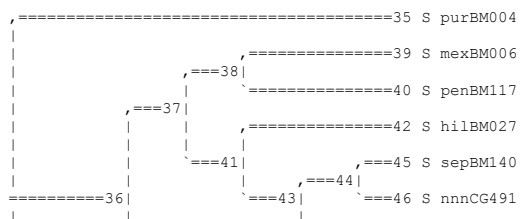

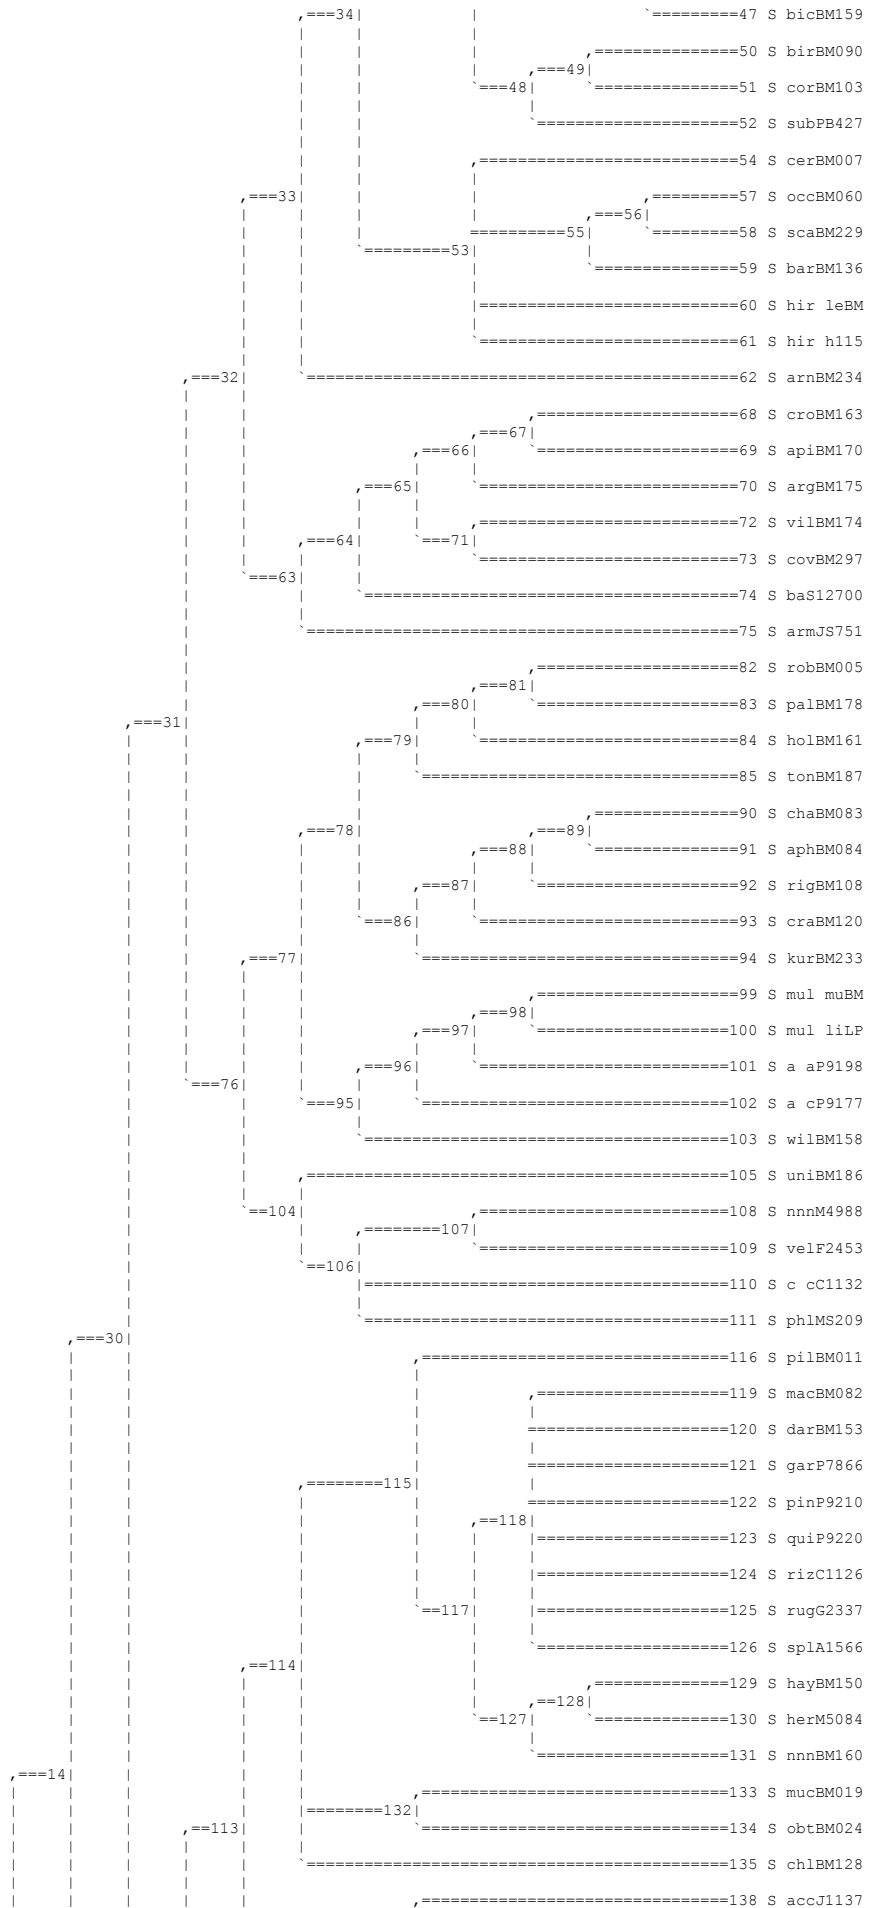

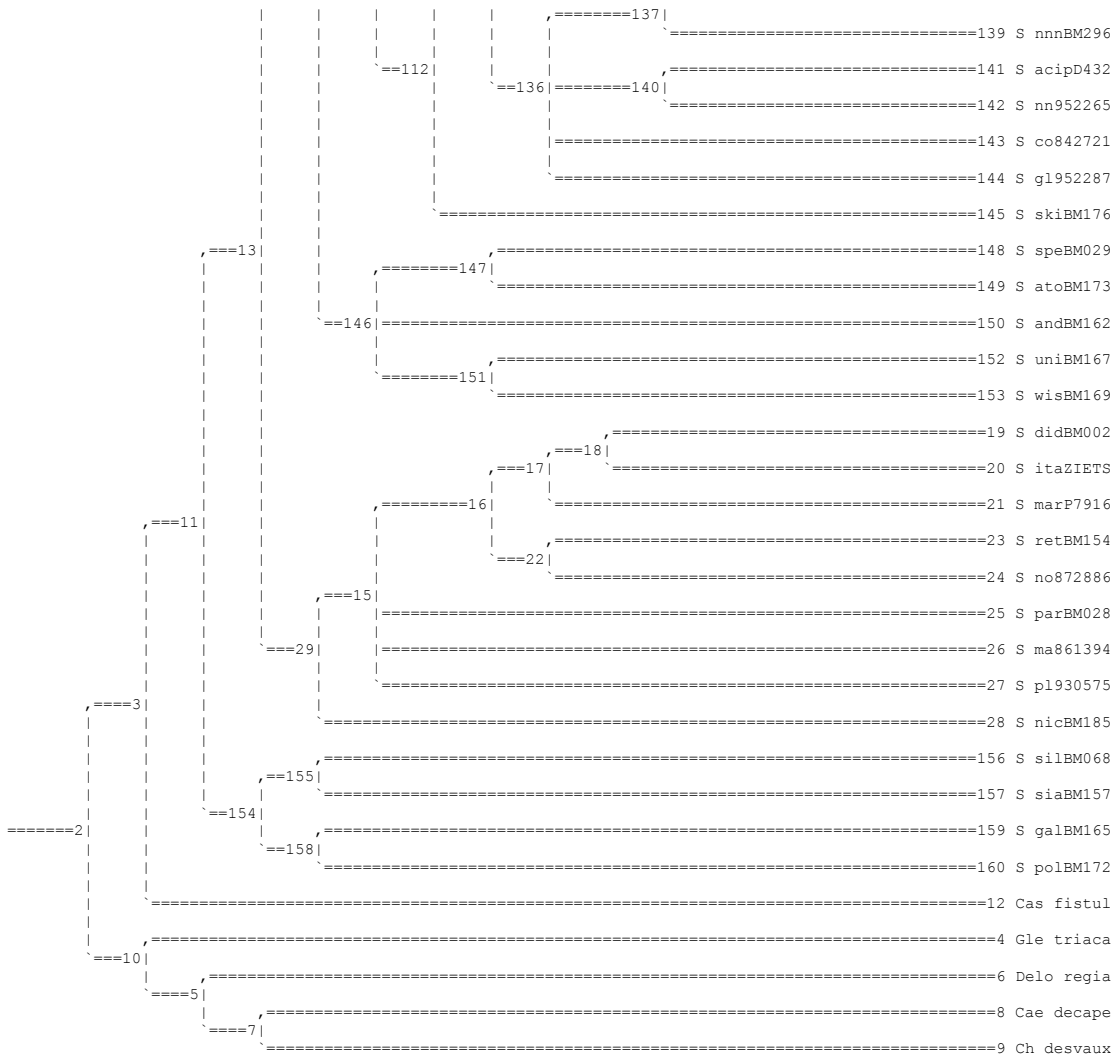

(A) RECONSTRUCTIONS OF LOCATION OF EFNs ON PLANT

----- Trace Character History -----

Character: EFN general location  
 Parsimony reconstruction (Unordered) [Steps: 19]

- node 2: absent
- node 3: absent
- node 4: absent
- node 5: absent
- node 6: absent
- node 7: absent
- node 8: absent
- node 9: leaf
- node 10: absent
- node 11: absent
- node 12: absent
- node 13: absent
- node 14: absent
- node 15: stipule,bract,sepal
- node 16: stipule,bract,sepal
- node 17: stipule,bract,sepal
- node 18: stipule
- node 19: stipule,bract,sepal
- node 20: stipule,bract,sepal
- node 21: stipule,bract,sepal
- node 22: stipule,bract,sepal
- node 23: stipule,bract,sepal
- node 24: bract,sepal
- node 25: stipule,bract,sepal
- node 26: stipule,bract,sepal
- node 27: stipule,bract,sepal
- node 28: absent,stipule,bract,sepal
- node 29: absent,stipule,bract,sepal
- node 30: leaf
- node 31: leaf
- node 32: leaf
- node 33: leaf
- node 34: leaf
- node 35: leaf
- node 36: leaf
- node 37: leaf



node 38: leaf  
node 39: leaf  
node 40: leaf  
node 41: leaf  
node 42: leaf  
node 43: leaf  
node 44: leaf  
node 45: leaf  
node 46: leaf  
node 47: leaf  
node 48: leaf  
node 49: leaf  
node 50: leaf  
node 51: leaf  
node 52: leaf  
node 53: leaf  
node 54: leaf  
node 55: leaf  
node 56: leaf  
node 57: leaf  
node 58: leaf  
node 59: leaf  
node 60: leaf  
node 61: leaf  
node 62: leaf  
node 63: leaf  
node 64: leaf  
node 65: leaf  
node 66: leaf  
node 67: leaf  
node 68: leaf  
node 69: leaf  
node 70: leaf  
node 71: leaf  
node 72: leaf  
node 73: leaf  
node 74: leaf  
node 75: leaf  
node 76: leaf  
node 77: leaf  
node 78: leaf  
node 79: leaf  
node 80: leaf  
node 81: leaf  
node 82: leaf  
node 83: leaf  
node 84: leaf  
node 85: leaf,pedicel base  
node 86: leaf,pedicel base  
node 87: leaf  
node 88: leaf,pedicel base  
node 89: leaf  
node 90: leaf  
node 91: leaf  
node 92: leaf  
node 93: leaf  
node 94: leaf  
node 95: leaf  
node 96: leaf  
node 97: leaf  
node 98: leaf  
node 99: leaf  
node 100: leaf  
node 101: leaf  
node 102: leaf  
node 103: leaf  
node 104: leaf  
node 105: leaf  
node 106: leaf  
node 107: leaf,pedicel base  
node 108: leaf  
node 109: leaf  
node 110: leaf,pedicel base  
node 111: leaf,pedicel base  
node 112: leaf,pedicel base  
node 113: leaf,pedicel base  
node 114: leaf  
node 115: leaf  
node 116: leaf  
node 117: leaf  
node 118: leaf  
node 119: leaf  
node 120: leaf  
node 121: leaf  
node 122: leaf  
node 123: leaf  
node 124: leaf  
node 125: leaf  
node 126: leaf  
node 127: leaf  
node 128: leaf  
node 129: leaf  
node 130: leaf  
node 131: leaf  
node 132: leaf  
node 133: leaf  
node 134: leaf  
node 135: leaf  
node 136: leaf  
node 137: leaf  
node 138: leaf  
node 139: leaf  
node 140: leaf  
node 141: leaf  
node 142: leaf

node 143: leaf  
node 144: leaf  
node 145: leaf  
node 146: leaf  
node 147: leaf  
node 148: leaf  
node 149: absent  
node 150: absent  
node 151: absent  
node 152: absent  
node 153: absent  
node 154: absent  
node 155: absent  
node 156: absent  
node 157: absent  
node 158: absent  
node 159: absent  
node 160: absent  
node 161: absent  
node 162: absent  
node 163: absent  
node 164: absent

----- Trace Character Over Trees -----

EFN general location

Reconstructed Ancestral States (Parsimony Ancestral States) over 500 trees. Shown for each state at each node is the number of trees on which the reconstructed state set at the node includes that state (it may also include other states as equally or sufficiently optimal according to the reconstruction criteria).

node 2: Node in 500 trees. Optimal states and count of trees with each: absent: 500.0  
node 3: Node in 457 trees. Optimal states and count of trees with each: absent: 457.0  
node 5: Node in 143 trees. Optimal states and count of trees with each: absent: 143.0  
node 7: Node in 65 trees. Optimal states and count of trees with each: absent: 65.0  
node 10: Node in 457 trees. Optimal states and count of trees with each: absent: 457.0  
node 11: Node in 496 trees. Optimal states and count of trees with each: absent: 496.0  
node 13: Node in 353 trees. Optimal states and count of trees with each: absent: 332.23529412; leaf: 6.60695187; stipule: 4.71925134; bract: 4.71925134; sepal: 4.71925134  
node 14: Node in 410 trees. Optimal states and count of trees with each: absent: 404.08653846; leaf: 5.91346154  
node 15: Node in 487 trees. Optimal states and count of trees with each: absent: 36.857320099; leaf: 8.76116625; stipule: 147.12717122; bract: 147.12717122; sepal: 147.12717122  
node 16: Node in 182 trees. Optimal states and count of trees with each: stipule: 60.66666667; bract: 60.66666667; sepal: 60.66666667  
node 17: Node in 235 trees. Optimal states and count of trees with each: stipule: 78.33333333; bract: 78.33333333; sepal: 78.33333333  
node 18: Node in 497 trees. Optimal states and count of trees with each: stipule: 165.66666667; bract: 165.66666667; sepal: 165.66666667  
node 22: Node in 113 trees. Optimal states and count of trees with each: stipule: 37.66666667; bract: 37.66666667; sepal: 37.66666667  
node 29: Node in 495 trees. Optimal states and count of trees with each: absent: 114.66239527; leaf: 18.05322819; stipule: 120.76145885; bract: 120.76145885; sepal: 120.76145885  
node 30: Node in 466 trees. Optimal states and count of trees with each: leaf: 466.0  
node 31: Node in 409 trees. Optimal states and count of trees with each: leaf: 409.0  
node 32: Node in 500 trees. Optimal states and count of trees with each: leaf: 500.0  
node 33: Node in 363 trees. Optimal states and count of trees with each: leaf: 363.0  
node 34: Node in 225 trees. Optimal states and count of trees with each: leaf: 225.0  
node 36: Node in 294 trees. Optimal states and count of trees with each: leaf: 294.0  
node 37: Node in 495 trees. Optimal states and count of trees with each: leaf: 495.0  
node 38: Node in 484 trees. Optimal states and count of trees with each: leaf: 484.0  
node 41: Node in 431 trees. Optimal states and count of trees with each: leaf: 431.0  
node 43: Node in 480 trees. Optimal states and count of trees with each: leaf: 480.0  
node 44: Node in 500 trees. Optimal states and count of trees with each: leaf: 500.0  
node 48: Node in 403 trees. Optimal states and count of trees with each: leaf: 403.0  
node 49: Node in 227 trees. Optimal states and count of trees with each: leaf: 227.0  
node 53: Node in 487 trees. Optimal states and count of trees with each: leaf: 487.0  
node 55: Node in 448 trees. Optimal states and count of trees with each: leaf: 448.0  
node 56: Node in 479 trees. Optimal states and count of trees with each: leaf: 479.0  
node 63: Node in 500 trees. Optimal states and count of trees with each: leaf: 500.0  
node 64: Node in 71 trees. Optimal states and count of trees with each: leaf: 71.0  
node 65: Node in 26 trees. Optimal states and count of trees with each: leaf: 26.0  
node 66: Node in 497 trees. Optimal states and count of trees with each: leaf: 497.0  
node 67: Node in 480 trees. Optimal states and count of trees with each: leaf: 480.0  
node 71: Node in 6 trees. Optimal states and count of trees with each: leaf: 6.0  
node 76: Node in 499 trees. Optimal states and count of trees with each: leaf: 499.0  
node 77: Node in 498 trees. Optimal states and count of trees with each: leaf: 498.0  
node 78: Node in 477 trees. Optimal states and count of trees with each: leaf: 477.0  
node 79: Node in 423 trees. Optimal states and count of trees with each: leaf: 423.0  
node 80: Node in 500 trees. Optimal states and count of trees with each: leaf: 500.0  
node 81: Node in 499 trees. Optimal states and count of trees with each: leaf: 499.0  
node 86: Node in 339 trees. Optimal states and count of trees with each: leaf: 339.0  
node 87: Node in 499 trees. Optimal states and count of trees with each: leaf: 499.0  
node 88: Node in 262 trees. Optimal states and count of trees with each: leaf: 262.0  
node 89: Node in 349 trees. Optimal states and count of trees with each: leaf: 349.0  
node 95: Node in 132 trees. Optimal states and count of trees with each: leaf: 132.0  
node 96: Node in 496 trees. Optimal states and count of trees with each: leaf: 496.0  
node 97: Node in 498 trees. Optimal states and count of trees with each: leaf: 498.0  
node 98: Node in 497 trees. Optimal states and count of trees with each: leaf: 497.0  
node 104: Node in 498 trees. Optimal states and count of trees with each: leaf: 498.0  
node 106: Node in 500 trees. Optimal states and count of trees with each: leaf: 500.0  
node 107: Node in 327 trees. Optimal states and count of trees with each: leaf: 327.0  
node 112: Node in 496 trees. Optimal states and count of trees with each: leaf: 496.0  
node 113: Node in 496 trees. Optimal states and count of trees with each: leaf: 496.0  
node 114: Node in 332 trees. Optimal states and count of trees with each: leaf: 332.0  
node 115: Node in 86 trees. Optimal states and count of trees with each: leaf: 86.0  
node 117: Node in 500 trees. Optimal states and count of trees with each: leaf: 500.0  
node 118: Node in 484 trees. Optimal states and count of trees with each: leaf: 484.0  
node 127: Node in 415 trees. Optimal states and count of trees with each: leaf: 415.0  
node 128: Node in 326 trees. Optimal states and count of trees with each: leaf: 326.0  
node 132: Node in 496 trees. Optimal states and count of trees with each: leaf: 496.0  
node 136: Node in 395 trees. Optimal states and count of trees with each: leaf: 395.0  
node 137: Node in 43 trees. Optimal states and count of trees with each: leaf: 43.0  
node 140: Node in 63 trees. Optimal states and count of trees with each: leaf: 63.0  
node 146: Node in 387 trees. Optimal states and count of trees with each: absent: 387.0  
node 147: Node in 408 trees. Optimal states and count of trees with each: absent: 408.0

node 151: Node in 500 trees. Optimal states and count of trees with each: absent: 500.0  
node 154: Node in 484 trees. Optimal states and count of trees with each: absent: 484.0  
node 155: Node in 205 trees. Optimal states and count of trees with each: absent: 205.0  
node 158: Node in 498 trees. Optimal states and count of trees with each: absent: 498.0

----- Values for Current Tree -----

For character 1, Parsimony steps: 19 (unordered)  
For character 1, C.I.: 0.94736842  
For character 1, R.I.: 0.93333333

=====

(B) RECONSTRUCTIONS OF LOCATION OF EFNS ON PLANT

----- Trace Character History -----

Character: Location of leaf EFNs  
Parsimony reconstruction (Unordered) [Steps: 24]

node 2: absent  
node 3: absent  
node 4: absent  
node 5: absent  
node 6: absent  
node 7: absent  
node 8: absent  
node 9: along petiole  
node 10: absent  
node 11: absent  
node 12: absent  
node 13: absent  
node 14: absent  
node 15: absent  
node 16: absent  
node 17: absent  
node 18: absent  
node 19: absent  
node 20: absent  
node 21: absent  
node 22: absent  
node 23: absent  
node 24: absent  
node 25: absent  
node 26: absent  
node 27: absent  
node 28: absent  
node 29: absent  
node 30: 1. pair  
node 31: 1. pair  
node 32: 1. pair  
node 33: 1. pair  
node 34: 1. pair  
node 35: 1. pair  
node 36: 1. pair  
node 37: 1. pair  
node 38: 1. pair  
node 39: 1. pair  
node 40: 1.+2.pairs  
node 41: 1. pair  
node 42: 1. pair  
node 43: 1. pair  
node 44: 1.+2.pairs  
node 45: 1.+2.pairs  
node 46: 1.+2.pairs  
node 47: 1. pair  
node 48: 1. pair  
node 49: 1. pair  
node 50: 1. pair  
node 51: 1. pair  
node 52: 1. pair  
node 53: petiole base  
node 54: petiole base  
node 55: petiole base  
node 56: petiole base  
node 57: petiole base  
node 58: petiole base  
node 59: petiole base  
node 60: petiole base  
node 61: petiole base  
node 62: petiole base  
node 63: petiole base  
node 64: 1. pair  
node 65: 1. pair  
node 66: 1. pair  
node 67: 1. pair  
node 68: 1. pair  
node 69: 1.+2.pairs  
node 70: 1. pair  
node 71: 1. pair  
node 72: 1. pair  
node 73: 1. pair  
node 74: 1. pair  
node 75: all pairs  
node 76: 1. pair  
node 77: 1.+2.pairs  
node 78: 1. pair,1.+2.pairs  
node 79: 1. pair,1.+2.pairs  
node 80: 1. pair,1.+2.pairs  
node 81: 1. pair,1.+2.pairs  
node 82: 1. pair,1.+2.pairs  
node 83: 1. pair,1.+2.pairs  
node 84: 1.+2.pairs  
node 85: 1.+2.pairs

```

node 86: 1.+2.pairs
node 87: 1. pair
node 88: all pairs
node 89: absent,1. pair,1.+2.pairs
node 90: absent
node 91: absent
node 92: absent
node 93: absent
node 94: absent
node 95: absent
node 96: absent
node 97: 1. pair
node 98: 1. pair,1.+2.pairs
node 99: 1. pair,1.+2.pairs
node 100: 1. pair
node 101: 1. pair
node 102: 1. pair
node 103: 1.+2.pairs
node 104: 1.+2.pairs
node 105: all pairs
node 106: 1.+2.pairs
node 107: 1.+2.pairs
node 108: 1.+2.pairs
node 109: 1.+2.pairs
node 110: 1.+2.pairs
node 111: 1.+2.pairs
node 112: 1.+2.pairs
node 113: all pairs
node 114: 1. pair
node 115: 1. pair
node 116: 1. pair
node 117: 1. pair
node 118: all pairs
node 119: 1. pair
node 120: 1. pair
node 121: 1.+2.pairs
node 122: 1. pair
node 123: 1. pair
node 124: 1. pair
node 125: 1. pair
node 126: 1. pair
node 127: all pairs
node 128: all pairs
node 129: 1. pair
node 130: all pairs
node 131: 1. pair
node 132: 1. pair
node 133: 1. pair
node 134: 1. pair
node 135: 1. pair
node 136: 1. pair
node 137: 1. pair
node 138: 1. pair
node 139: 1. pair
node 140: 1. pair
node 141: 1.+2.pairs
node 142: 1. pair,1.+2.pairs
node 143: 1. pair,1.+2.pairs
node 144: 1. pair
node 145: 1.+2.pairs
node 146: 1.+2.pairs
node 147: 1. pair
node 148: 1. pair
node 149: absent
node 150: absent
node 151: absent
node 152: absent
node 153: absent
node 154: absent
node 155: absent
node 156: absent
node 157: absent
node 158: absent
node 159: absent
node 160: absent
node 161: absent
node 162: absent
node 163: absent
node 164: absent

```

=====

----- Trace Character Over Trees -----

Location of leaf EFNs

Reconstructed Ancestral States (Parsimony Ancestral States) over 500 trees. Shown for each state at each node is the number of trees on which the reconstructed state set at the node includes that state (it may also include other states as equally or sufficiently optimal according to the reconstruction criteria).

```

node 2: Node in 500 trees. Optimal states and count of trees with each: absent: 500.0
node 3: Node in 457 trees. Optimal states and count of trees with each: absent: 457.0
node 5: Node in 143 trees. Optimal states and count of trees with each: absent: 143.0
node 7: Node in 65 trees. Optimal states and count of trees with each: absent: 65.0
node 10: Node in 457 trees. Optimal states and count of trees with each: absent: 457.0
node 11: Node in 496 trees. Optimal states and count of trees with each: absent: 496.0
node 13: Node in 353 trees. Optimal states and count of trees with each: absent: 353.0
node 14: Node in 410 trees. Optimal states and count of trees with each: absent: 404.08653846; 1. pair: 5.91346154
node 15: Node in 487 trees. Optimal states and count of trees with each: absent: 487.0
node 16: Node in 182 trees. Optimal states and count of trees with each: absent: 182.0
node 17: Node in 235 trees. Optimal states and count of trees with each: absent: 235.0
node 18: Node in 497 trees. Optimal states and count of trees with each: absent: 497.0
node 22: Node in 113 trees. Optimal states and count of trees with each: absent: 113.0
node 29: Node in 495 trees. Optimal states and count of trees with each: absent: 495.0

```

node 30: Node in 466 trees. Optimal states and count of trees with each: absent: 14.82306163; 1. pair: 431.72166998; 1.+2.pairs: 19.45526839  
node 31: Node in 409 trees. Optimal states and count of trees with each: absent: 22.77087794; 1. pair: 358.20342612; 1.+2.pairs: 28.02569593  
node 32: Node in 500 trees. Optimal states and count of trees with each: 1. pair: 488.28125; 1.+2.pairs: 11.71875  
node 33: Node in 363 trees. Optimal states and count of trees with each: 1. pair: 363.0  
node 34: Node in 225 trees. Optimal states and count of trees with each: 1. pair: 225.0  
node 36: Node in 294 trees. Optimal states and count of trees with each: 1. pair: 294.0  
node 37: Node in 495 trees. Optimal states and count of trees with each: 1. pair: 495.0  
node 38: Node in 484 trees. Optimal states and count of trees with each: 1. pair: 484.0  
node 41: Node in 431 trees. Optimal states and count of trees with each: 1. pair: 431.0  
node 43: Node in 480 trees. Optimal states and count of trees with each: 1. pair: 480.0  
node 44: Node in 500 trees. Optimal states and count of trees with each: 1.+2.pairs: 500.0  
node 48: Node in 403 trees. Optimal states and count of trees with each: 1. pair: 403.0  
node 49: Node in 227 trees. Optimal states and count of trees with each: 1. pair: 227.0  
node 53: Node in 487 trees. Optimal states and count of trees with each: petiole base: 487.0  
node 55: Node in 448 trees. Optimal states and count of trees with each: petiole base: 448.0  
node 56: Node in 479 trees. Optimal states and count of trees with each: petiole base: 479.0  
node 63: Node in 500 trees. Optimal states and count of trees with each: 1. pair: 488.28125; 1.+2.pairs: 11.71875  
node 64: Node in 71 trees. Optimal states and count of trees with each: 1. pair: 71.0  
node 65: Node in 26 trees. Optimal states and count of trees with each: 1. pair: 26.0  
node 66: Node in 497 trees. Optimal states and count of trees with each: 1. pair: 497.0  
node 67: Node in 480 trees. Optimal states and count of trees with each: 1. pair: 480.0  
node 71: Node in 6 trees. Optimal states and count of trees with each: 1. pair: 2.0; 1.+2.pairs: 2.0; all pairs: 2.0  
node 76: Node in 499 trees. Optimal states and count of trees with each: absent: 0.50404040; 1. pair: 248.49191919; 1.+2.pairs: 250.00404040  
node 77: Node in 498 trees. Optimal states and count of trees with each: absent: 0.50404858; 1. pair: 247.99190283; 1.+2.pairs: 249.50404858  
node 78: Node in 477 trees. Optimal states and count of trees with each: absent: 22.03012048; 1. pair: 227.48493976; 1.+2.pairs: 227.48493976  
node 79: Node in 423 trees. Optimal states and count of trees with each: 1. pair: 210.5; 1.+2.pairs: 210.5; all pairs: 2.0  
node 80: Node in 500 trees. Optimal states and count of trees with each: 1. pair: 249.24924925; 1.+2.pairs: 248.74874875; all pairs: 2.00200200  
node 81: Node in 499 trees. Optimal states and count of trees with each: 1.+2.pairs: 499.0  
node 86: Node in 339 trees. Optimal states and count of trees with each: absent: 113.0; 1. pair: 113.33531157; 1.+2.pairs: 112.66468843  
node 87: Node in 499 trees. Optimal states and count of trees with each: absent: 499.0  
node 88: Node in 262 trees. Optimal states and count of trees with each: absent: 262.0  
node 89: Node in 349 trees. Optimal states and count of trees with each: absent: 349.0  
node 95: Node in 132 trees. Optimal states and count of trees with each: 1. pair: 44.0; 1.+2.pairs: 44.33846154; all pairs: 43.66153846  
node 96: Node in 496 trees. Optimal states and count of trees with each: 1. pair: 247.24313327; 1.+2.pairs: 248.75686673  
node 97: Node in 498 trees. Optimal states and count of trees with each: 1. pair: 248.24316109; 1.+2.pairs: 249.75683891  
node 98: Node in 497 trees. Optimal states and count of trees with each: 1. pair: 497.0  
node 104: Node in 498 trees. Optimal states and count of trees with each: 1.+2.pairs: 498.0  
node 106: Node in 500 trees. Optimal states and count of trees with each: 1.+2.pairs: 500.0  
node 107: Node in 327 trees. Optimal states and count of trees with each: 1.+2.pairs: 327.0  
node 112: Node in 496 trees. Optimal states and count of trees with each: 1. pair: 490.07171315; 1.+2.pairs: 5.92828685  
node 113: Node in 496 trees. Optimal states and count of trees with each: 1. pair: 490.07171315; 1.+2.pairs: 5.92828685  
node 114: Node in 332 trees. Optimal states and count of trees with each: 1. pair: 332.0  
node 115: Node in 86 trees. Optimal states and count of trees with each: 1. pair: 86.0  
node 117: Node in 500 trees. Optimal states and count of trees with each: 1. pair: 500.0  
node 118: Node in 484 trees. Optimal states and count of trees with each: 1. pair: 484.0  
node 127: Node in 415 trees. Optimal states and count of trees with each: 1. pair: 415.0  
node 128: Node in 326 trees. Optimal states and count of trees with each: 1. pair: 326.0  
node 132: Node in 496 trees. Optimal states and count of trees with each: 1. pair: 496.0  
node 136: Node in 395 trees. Optimal states and count of trees with each: 1. pair: 395.0  
node 137: Node in 43 trees. Optimal states and count of trees with each: 1. pair: 43.0  
node 140: Node in 63 trees. Optimal states and count of trees with each: 1.+2.pairs: 63.0  
node 146: Node in 387 trees. Optimal states and count of trees with each: absent: 387.0  
node 147: Node in 408 trees. Optimal states and count of trees with each: absent: 408.0  
node 151: Node in 500 trees. Optimal states and count of trees with each: absent: 500.0  
node 154: Node in 484 trees. Optimal states and count of trees with each: absent: 484.0  
node 155: Node in 205 trees. Optimal states and count of trees with each: absent: 205.0  
node 158: Node in 498 trees. Optimal states and count of trees with each: absent: 498.0

----- Values for Current Tree -----

For character 2, Parsimony steps: 23 (unordered)  
For character 2, C.I.: 0.21739130  
For character 2, R.I.: 0.66037736

=====

(C) RECONSTRUCTIONS OF MORPHOLOGY OF EFNs

----- Trace Character History -----

Character: EFN morphology  
Parsimony reconstruction (Unordered) [Steps: 3]

node 2: absent  
node 3: absent  
node 4: absent  
node 5: absent  
node 6: absent  
node 7: absent  
node 8: absent  
node 9: true  
node 10: absent  
node 11: absent  
node 12: absent  
node 13: absent  
node 14: absent  
node 15: substitutive  
node 16: substitutive  
node 17: substitutive  
node 18: substitutive  
node 19: substitutive  
node 20: substitutive  
node 21: substitutive  
node 22: substitutive  
node 23: substitutive  
node 24: substitutive

node 25: substitutive  
node 26: substitutive  
node 27: substitutive  
node 28: absent,substitutive  
node 29: absent,substitutive  
node 30: true  
node 31: true  
node 32: true  
node 33: true  
node 34: true  
node 35: true  
node 36: true  
node 37: true  
node 38: true  
node 39: true  
node 40: true  
node 41: true  
node 42: true  
node 43: true  
node 44: true  
node 45: true  
node 46: true  
node 47: true  
node 48: true  
node 49: true  
node 50: true  
node 51: true  
node 52: true  
node 53: true  
node 54: true  
node 55: true  
node 56: true  
node 57: true  
node 58: true  
node 59: true  
node 60: true  
node 61: true  
node 62: true  
node 63: true  
node 64: true  
node 65: true  
node 66: true  
node 67: true  
node 68: true  
node 69: true  
node 70: true  
node 71: true  
node 72: true  
node 73: true  
node 74: true  
node 75: true  
node 76: true  
node 77: true  
node 78: true  
node 79: true  
node 80: true  
node 81: true  
node 82: true  
node 83: true  
node 84: true  
node 85: true  
node 86: true  
node 87: true  
node 88: true  
node 89: true  
node 90: true  
node 91: true  
node 92: true  
node 93: true  
node 94: true  
node 95: true  
node 96: true  
node 97: true  
node 98: true  
node 99: true  
node 100: true  
node 101: true  
node 102: true  
node 103: true  
node 104: true  
node 105: true  
node 106: true  
node 107: true  
node 108: true  
node 109: true  
node 110: true  
node 111: true  
node 112: true  
node 113: true  
node 114: true  
node 115: true  
node 116: true  
node 117: true  
node 118: true  
node 119: true  
node 120: true  
node 121: true  
node 122: true  
node 123: true  
node 124: true  
node 125: true  
node 126: true  
node 127: true  
node 128: true  
node 129: true

```

node 130: true
node 131: true
node 132: true
node 133: true
node 134: true
node 135: true
node 136: true
node 137: true
node 138: true
node 139: true
node 140: true
node 141: true
node 142: true
node 143: true
node 144: true
node 145: true
node 146: true
node 147: true
node 148: true
node 149: absent
node 150: absent
node 151: absent
node 152: absent
node 153: absent
node 154: absent
node 155: absent
node 156: absent
node 157: absent
node 158: absent
node 159: absent
node 160: absent
node 161: absent
node 162: absent
node 163: absent
node 164: absent

```

=====

----- Trace Character Over Trees -----

EFN morphology

Reconstructed Ancestral States (Parsimony Ancestral States) over 500 trees. Shown for each state at each node is the number of trees on which the reconstructed state set at the node includes that state (it may also include other states as equally or sufficiently optimal according to the reconstruction criteria).

```

node 2: Node in 500 trees. Optimal states and count of trees with each: absent: 500.0
node 3: Node in 457 trees. Optimal states and count of trees with each: absent: 457.0
node 5: Node in 143 trees. Optimal states and count of trees with each: absent: 143.0
node 7: Node in 65 trees. Optimal states and count of trees with each: absent: 65.0
node 10: Node in 457 trees. Optimal states and count of trees with each: absent: 457.0
node 11: Node in 496 trees. Optimal states and count of trees with each: absent: 496.0
node 13: Node in 353 trees. Optimal states and count of trees with each: absent: 341.36263736; true: 6.78846154; substitutive:
4.848901098
node 14: Node in 410 trees. Optimal states and count of trees with each: absent: 404.08653846; true: 5.91346154
node 15: Node in 487 trees. Optimal states and count of trees with each: absent: 12.48717949; true: 6.72386588; substitutive:
467.78895464
node 16: Node in 182 trees. Optimal states and count of trees with each: substitutive: 182.0
node 17: Node in 235 trees. Optimal states and count of trees with each: substitutive: 235.0
node 18: Node in 497 trees. Optimal states and count of trees with each: substitutive: 497.0
node 22: Node in 113 trees. Optimal states and count of trees with each: substitutive: 113.0
node 29: Node in 495 trees. Optimal states and count of trees with each: absent: 223.91722810; true: 35.25505294; substitutive:
235.82771896
node 30: Node in 466 trees. Optimal states and count of trees with each: true: 466.0
node 31: Node in 409 trees. Optimal states and count of trees with each: true: 409.0
node 32: Node in 500 trees. Optimal states and count of trees with each: true: 500.0
node 33: Node in 363 trees. Optimal states and count of trees with each: true: 363.0
node 34: Node in 225 trees. Optimal states and count of trees with each: true: 225.0
node 36: Node in 294 trees. Optimal states and count of trees with each: true: 294.0
node 37: Node in 495 trees. Optimal states and count of trees with each: true: 495.0
node 38: Node in 484 trees. Optimal states and count of trees with each: true: 484.0
node 41: Node in 431 trees. Optimal states and count of trees with each: true: 431.0
node 43: Node in 480 trees. Optimal states and count of trees with each: true: 480.0
node 44: Node in 500 trees. Optimal states and count of trees with each: true: 500.0
node 48: Node in 403 trees. Optimal states and count of trees with each: true: 403.0
node 49: Node in 227 trees. Optimal states and count of trees with each: true: 227.0
node 53: Node in 487 trees. Optimal states and count of trees with each: true: 487.0
node 55: Node in 448 trees. Optimal states and count of trees with each: true: 448.0
node 56: Node in 479 trees. Optimal states and count of trees with each: true: 479.0
node 63: Node in 500 trees. Optimal states and count of trees with each: true: 500.0
node 64: Node in 71 trees. Optimal states and count of trees with each: true: 71.0
node 65: Node in 26 trees. Optimal states and count of trees with each: true: 26.0
node 66: Node in 497 trees. Optimal states and count of trees with each: true: 497.0
node 67: Node in 480 trees. Optimal states and count of trees with each: true: 480.0
node 71: Node in 6 trees. Optimal states and count of trees with each: true: 6.0
node 76: Node in 499 trees. Optimal states and count of trees with each: true: 499.0
node 77: Node in 498 trees. Optimal states and count of trees with each: true: 498.0
node 78: Node in 477 trees. Optimal states and count of trees with each: true: 477.0
node 79: Node in 423 trees. Optimal states and count of trees with each: true: 423.0
node 80: Node in 500 trees. Optimal states and count of trees with each: true: 500.0
node 81: Node in 499 trees. Optimal states and count of trees with each: true: 499.0
node 86: Node in 339 trees. Optimal states and count of trees with each: true: 339.0
node 87: Node in 499 trees. Optimal states and count of trees with each: true: 499.0
node 88: Node in 262 trees. Optimal states and count of trees with each: true: 262.0
node 89: Node in 349 trees. Optimal states and count of trees with each: true: 349.0
node 95: Node in 132 trees. Optimal states and count of trees with each: true: 132.0
node 96: Node in 496 trees. Optimal states and count of trees with each: true: 496.0
node 97: Node in 498 trees. Optimal states and count of trees with each: true: 498.0
node 98: Node in 497 trees. Optimal states and count of trees with each: true: 497.0
node 104: Node in 498 trees. Optimal states and count of trees with each: true: 498.0
node 106: Node in 500 trees. Optimal states and count of trees with each: true: 500.0
node 107: Node in 327 trees. Optimal states and count of trees with each: true: 327.0
node 112: Node in 496 trees. Optimal states and count of trees with each: true: 496.0
node 113: Node in 496 trees. Optimal states and count of trees with each: true: 496.0
node 114: Node in 332 trees. Optimal states and count of trees with each: true: 332.0

```

node 115: Node in 86 trees. Optimal states and count of trees with each: true: 86.0  
node 117: Node in 500 trees. Optimal states and count of trees with each: true: 500.0  
node 118: Node in 484 trees. Optimal states and count of trees with each: true: 484.0  
node 127: Node in 415 trees. Optimal states and count of trees with each: true: 415.0  
node 128: Node in 326 trees. Optimal states and count of trees with each: true: 326.0  
node 132: Node in 496 trees. Optimal states and count of trees with each: true: 496.0  
node 136: Node in 395 trees. Optimal states and count of trees with each: true: 395.0  
node 137: Node in 43 trees. Optimal states and count of trees with each: true: 43.0  
node 140: Node in 63 trees. Optimal states and count of trees with each: true: 63.0  
node 146: Node in 387 trees. Optimal states and count of trees with each: absent: 387.0  
node 147: Node in 408 trees. Optimal states and count of trees with each: absent: 408.0  
node 151: Node in 500 trees. Optimal states and count of trees with each: absent: 500.0  
node 154: Node in 484 trees. Optimal states and count of trees with each: absent: 484.0  
node 155: Node in 205 trees. Optimal states and count of trees with each: absent: 205.0  
node 158: Node in 498 trees. Optimal states and count of trees with each: absent: 498.0

----- Values for Current Tree -----

For character 3, Parsimony steps: 3 (unordered)  
For character 3, C.I.: 0.66666667  
For character 3, R.I.: 0.93333333

=====

## LITERATURE CITED

**Marazzi B, Sanderson MJ. 2010.** Large-scale patterns of diversification in the widespread legume genus *Senna* and the evolutionary role of extrafloral nectaries. *Evolution* **64**: 3570–3592.
